# Supplementary material
Source: MDPI journal article supplement (https://www.mdpi.com/2411-5142/7/2/46)
Supplement: s1 [file s1]

**Table S1. Sample**

| Mean touch-zone value for each leg in each ITU Triathlon Mixed Relay World Championship from 2014 to 2019         |       |      |                |      |                     |      |
|-------------------------------------------------------------------------------------------------------------------|-------|------|----------------|------|---------------------|------|
|                                                                                                                   | 2014  | 2015 | 2016           | 2017 | 2018                | 2019 |
| <b>Leg 1 (female)</b>                                                                                             | /     | /    | /              | /    | /                   | /    |
| <b>Leg 2 (male)</b>                                                                                               | 19 s  | 19 s | 21 s           | 21 s | 19 s                | 18 s |
| <b>Leg 3 (female)</b>                                                                                             | 18 s  | 18 s | 19 s           | 18 s | 17 s                | 17 s |
| <b>Leg 4 (male)</b>                                                                                               | 17 s  | 17 s | 18 s           | 18 s | 18 s                | 17 s |
| <b>Team</b>                                                                                                       | 54 s  | 54 s | 58 s           | 57 s | 54 s                | 52 s |
| Number of finishing teams and athletes in the ITU Triathlon Mixed Relay World Championships between 2014 and 2019 |       |      |                |      |                     |      |
| Year                                                                                                              | Teams |      | Total Athletes |      | Athletes for gender |      |
| 2014                                                                                                              | 16    |      | 64             |      | 32                  |      |
| 2015                                                                                                              | 16    |      | 64             |      | 32                  |      |
| 2016                                                                                                              | 12    |      | 48             |      | 24                  |      |
| 2017                                                                                                              | 18    |      | 72             |      | 36                  |      |
| 2018                                                                                                              | 17    |      | 68             |      | 34                  |      |
| 2019                                                                                                              | 13    |      | 52             |      | 26                  |      |
| <b>Total</b>                                                                                                      | 92    |      | 368            |      | 184                 |      |

# Table S2. Statistical Analysis Results

The results are showed following the order of Figures in the main text.

\* Significantly different ( $p \leq 0.05$ )

Pearson's  $r$  thresholds: .1 small (S), .3 moderate (M), .5 large (L), .7 very large (VL), .9 extremely large (EL)  
[9,10]

| Automatic linear regression: Leg times on relay time (Figure 1 C)                           |          |       |       |       |      |      |
|---------------------------------------------------------------------------------------------|----------|-------|-------|-------|------|------|
| Leg 1                                                                                       | Leg 2    | Leg 3 | Leg 4 |       |      |      |
| 0.22                                                                                        | 0.14     | 0.41  | 0.23  |       |      |      |
| Accuracy: 99.6%                                                                             |          |       |       |       |      |      |
| Automatic linear regression: Discipline/transition portion times on relay time (Figure 2 A) |          |       |       |       |      |      |
|                                                                                             | Accuracy | Swim  | T1    | Cycle | T2   | Run  |
| Total                                                                                       | 97.9%    | 0.11  | 0.01  | 0.66  | 0.00 | 0.21 |
| G1                                                                                          | 95.0%    | 0.14  | 0.04  | 0.68  | 0.00 | 0.14 |
| Automatic linear regression: Discipline/Transition portion times on leg time (Figure 2 B)   |          |       |       |       |      |      |
|                                                                                             | Accuracy | Swim  | T1    | Cycle | T2   | Run  |
| Total                                                                                       | 99.8%    | 0.16  | 0.02  | 0.64  | 0.00 | 0.17 |
| G1                                                                                          | 100%     | 0.16  | 0.02  | 0.69  | 0.00 | 0.12 |

| Discipline percentages comparisons (Figure 3 A-B)            |                                                           |                                                             |                                                            |                                                                            |                                                             |                                                                |                                                            |                                                                             |                                                             |                                                            |                                                             |
|--------------------------------------------------------------|-----------------------------------------------------------|-------------------------------------------------------------|------------------------------------------------------------|----------------------------------------------------------------------------|-------------------------------------------------------------|----------------------------------------------------------------|------------------------------------------------------------|-----------------------------------------------------------------------------|-------------------------------------------------------------|------------------------------------------------------------|-------------------------------------------------------------|
| Swim                                                         |                                                           | T1                                                          |                                                            | Cycle                                                                      |                                                             | T2                                                             |                                                            | Run                                                                         |                                                             |                                                            |                                                             |
| H <sub>(3, 364)</sub> = 5.899, p=0.117, η <sup>2</sup> =.018 |                                                           | H <sub>(3, 364)</sub> = 7.141, p=.068, η <sup>2</sup> =.020 |                                                            | H <sub>(3, 364)</sub> = 47.937, p=.000*, η <sup>2</sup> =.135 <sup>S</sup> |                                                             | H <sub>(3, 364)</sub> = 11.343, p=0.010*, η <sup>2</sup> =.029 |                                                            | H <sub>(3, 364)</sub> = 58.150, p=0.000*, η <sup>2</sup> =.143 <sup>S</sup> |                                                             |                                                            |                                                             |
| Cycle                                                        |                                                           |                                                             |                                                            | T2                                                                         |                                                             |                                                                |                                                            | Run                                                                         |                                                             |                                                            |                                                             |
| Leg                                                          | 1                                                         | 2                                                           | 3                                                          | 4                                                                          | 1                                                           | 2                                                              | 3                                                          | 4                                                                           | 1                                                           | 2                                                          | 3                                                           |
| 1                                                            |                                                           | U <sub>(182)</sub> =2145.000, p=.000* r=.432 <sup>M</sup>   | U <sub>(182)</sub> =2679.500, p=.000* r=.327 <sup>M</sup>  | U <sub>(182)</sub> =2008.000, p=.000* r=.459 <sup>M</sup>                  |                                                             | U <sub>(182)</sub> =3987.000, p=.497 r=.099                    | U <sub>(182)</sub> =3942.500, p=.423 r=-.018               | U <sub>(182)</sub> =3286.500, p=.009* r=-.161 <sup>S</sup>                  |                                                             | U <sub>(182)</sub> =1964.000, p=.000* r=-.437 <sup>M</sup> | U <sub>(182)</sub> =2858.000, p=.000* r=-.277 <sup>S</sup>  |
| 2                                                            | U <sub>(182)</sub> =2145.000, p=.000* r=.432 <sup>M</sup> |                                                             | U <sub>(182)</sub> =3712.000, p=.150; r=-.100 <sup>S</sup> | U <sub>(182)</sub> =4044.500, p=.604; r=.037                               | U <sub>(182)</sub> =3987.000, p=.497 r=.099                 |                                                                | U <sub>(182)</sub> =3809.000, p=.241; r=-.084              | U <sub>(182)</sub> =3110.000, p=.002*; r=-.195 <sup>S</sup>                 | U <sub>(182)</sub> =1964.000, p=.000*; r=-.437 <sup>M</sup> |                                                            | U <sub>(182)</sub> =3154.000, p=.003*; r=.239 <sup>S</sup>  |
| 3                                                            | U <sub>(182)</sub> =2679.500, p=.000* r=.327 <sup>M</sup> | U <sub>(182)</sub> =3712.000, p=.150; r=-.100               |                                                            | U <sub>(182)</sub> =3554.000, p=.061; r=.134                               | U <sub>(182)</sub> =3942.500, p=.423 r=-.018                | U <sub>(182)</sub> =3809.000, p=.241; r=-.084                  |                                                            | U <sub>(182)</sub> =3539.500, p=.055; r=-.137                               | U <sub>(182)</sub> =2858.000, p=.000* r=-.277 <sup>S</sup>  | U <sub>(182)</sub> =3154.000, p=.003*; r=.239 <sup>S</sup> |                                                             |
| 4                                                            | U <sub>(182)</sub> =2008.000, p=.000* r=.459 <sup>M</sup> | U <sub>(182)</sub> =4044.500, p=.604; r=.037                | U <sub>(182)</sub> =3554.000, p=.061; r=.134 <sup>S</sup>  |                                                                            | U <sub>(182)</sub> =3286.500, p=.009*, r=-.161 <sup>S</sup> | U <sub>(182)</sub> =3110.000, p=.002*; r=-.195 <sup>S</sup>    | U <sub>(182)</sub> =3539.500, p=.055; r=-.137 <sup>S</sup> |                                                                             | U <sub>(182)</sub> =1898.000, p=.000*, r=-.441 <sup>M</sup> | U <sub>(182)</sub> =4041.000, p=.597; r=-.027              | U <sub>(182)</sub> =3013.000, p=.001*; r=-.220 <sup>S</sup> |

| Discipline times comparisons: Same-sex (Figure 3 C-F) |                                                             |                                                |                                                             |                                                             |                                                             |
|-------------------------------------------------------|-------------------------------------------------------------|------------------------------------------------|-------------------------------------------------------------|-------------------------------------------------------------|-------------------------------------------------------------|
|                                                       | Swim                                                        | T1                                             | Cycle                                                       | T2                                                          | Run                                                         |
| Females                                               | U <sub>(182)</sub> = 4189.500, p=.906, r=-.033              | U <sub>(182)</sub> = 3772.000, p=.202, r=-.081 | U <sub>(182)</sub> = 2537.000, p=.000*, r=.364 <sup>M</sup> | U <sub>(182)</sub> = 4172.000, p=.866, r=.072               | U <sub>(182)</sub> = 3880.000, p=.330, r=-.043              |
| Males                                                 | U <sub>(182)</sub> = 2837.000, p=.000*, r=.281 <sup>S</sup> | U <sub>(182)</sub> = 4173.000, p=.870, r=-.011 | U <sub>(182)</sub> = 2623.000, p=.000*, r=.317 <sup>M</sup> | U <sub>(182)</sub> = 3806.000, p=.229, r=-.109 <sup>S</sup> | U <sub>(182)</sub> = 2930.500, p=.000*, r=.243 <sup>S</sup> |

| Leg times comparisons: Same-sex (Figure 1 B) |                                         |
|----------------------------------------------|-----------------------------------------|
| Females                                      | Males                                   |
| $U_{(182)}=219.00, p=.000^*, r=.400^M$       | $U_{(182)}=3242.00, p=.006^*, r=.255^S$ |

| Leg comparisons: Percentage values on relay time (Figure 1 A) |                                           |                                          |                                          |                                           |
|---------------------------------------------------------------|-------------------------------------------|------------------------------------------|------------------------------------------|-------------------------------------------|
|                                                               | Leg 1                                     | Leg 2                                    | Leg 3                                    | Leg 4                                     |
| Leg 1                                                         |                                           | $U_{(182)}=.000, p=.000^*, r=-.952^{EL}$ | $U_{(182)}=2461.500, p=.000^*, r=.377^M$ | $U_{(182)}=1.000, p=.000^*, r=-.919^{EL}$ |
| Leg 2                                                         | $U_{(182)}=.000, p=.000^*, r=-.952^{EL}$  |                                          | $U_{(182)}=.000, p=.000^*, r=.958^{EL}$  | $U_{(182)}=1226.000, p=.000^*, r=.604^L$  |
| Leg 3                                                         | $U_{(182)}=2461.500^*, p=.000, r=.377^M$  | $U_{(182)}=.000, p=.000^*, r=.958^{EL}$  |                                          | $U_{(182)}=.000, p=.000^*, r=-.934^{EL}$  |
| Leg 4                                                         | $U_{(182)}=1.000, p=.000^*, r=-.919^{EL}$ | $U_{(182)}=1226.000, p=.000^*, r=.600^L$ | $U_{(182)}=.000, p=.000^*, r=-.934^{EL}$ |                                           |
| $H_{(3, 364)}=298.62, p=.000^*, \eta^2=.894^{VL}$             |                                           |                                          |                                          |                                           |
